# Supplementary material for: Identification and Quantification of a Pneumococcal Cell Wall Polysaccharide by Antibody-Enhanced Chromatography Assay
Source: MDPI journal article supplement (doi:10.3390/vaccines12050469), 2024-04-28
Supplement: s1 [file s1]

Supplementary Material:

Identification and Quantification of a Pneumococcal Cell Wall Polysaccharide by  
Antibody Enhanced Chromatography Assay

*James Z Deng<sup>\*1</sup>, Zhifeng Chen<sup>4</sup>, James Small<sup>2</sup>, Yue Yuan<sup>2</sup>, Kara Cox<sup>4</sup>, Aimin Tang<sup>4</sup>, Jeanette  
Roman<sup>3</sup>, Liming Guan<sup>3</sup>, Katrina Feller<sup>3</sup>, Frances Ansbro<sup>3</sup>, Kalpit Vora<sup>4</sup>*

<sup>1</sup>Vaccine Analytical Research & Development, <sup>2</sup>Analytical Enabling Capabilities, <sup>3</sup>Cell Potency  
Assays, MRL Analytical Research & Development; <sup>4</sup>Infectious Diseases and Vaccines

Discovery

Merck & Co., Inc., Rahway, NJ, USA

Table S1. Linearity range data for Figure 4. Peak area was averaged from duplicate injections.

| Standard       | [C-Ps2] (µg/mL) | FLR peak area |
|----------------|-----------------|---------------|
| STD-1          | 0.038           | 4584243       |
| STD-2          | 0.077           | 6470121       |
| STD-3          | 0.153           | 12968044      |
| STD-4          | 0.307           | 26406878      |
| STD-5          | 0.460           | 39588339      |
| STD-6          | 0.613           | 50586978      |
| STD-7          | 0.766           | 64358442      |
| R <sup>2</sup> | 0.9992          |               |

Table S2. C-Ps2 quantification precision assessment for 5 PnPs serotypes in six runs. Peak area was averaged from duplicate injections. % C-Ps2 was obtained by Sample [C-Ps2] divided by Sample [Total Ps].

| Experiment-1                  | Sample [Total Ps] (µg/mL) | Dilution | FLR Peak Area | Measured [C-Ps2] (µg/mL) | Sample [C-Ps2] (µg/mL) | % C-Ps2 |
|-------------------------------|---------------------------|----------|---------------|--------------------------|------------------------|---------|
| ST-4                          | 100                       | 40       | 33980613      | 0.224                    | 9.0                    | 9.0     |
| ST-6A                         | 100                       | 10       | 55478804      | 0.351                    | 3.5                    | 3.5     |
| ST-9V                         | 100                       | 2        | 24298118      | 0.167                    | 0.3                    | 0.3     |
| ST-12F                        | 100                       | 20       | 47823025      | 0.306                    | 6.1                    | 6.1     |
| ST-19A                        | 100                       | 10       | 50769460      | 0.323                    | 3.2                    | 3.2     |
| Standard Curve R <sup>2</sup> |                           |          | 0.995828331   |                          |                        |         |
| Intercept                     |                           |          | -3916297.64   |                          |                        |         |
| Slope                         |                           |          | 169276178.1   |                          |                        |         |

| Experiment-2                  | Sample [Total Ps] (µg/mL) | Dilution | FLR Area     | Measured [C-Ps2] (µg/mL) | Sample [C-Ps2] (µg/mL) | % C-Ps2 |
|-------------------------------|---------------------------|----------|--------------|--------------------------|------------------------|---------|
| ST-4                          | 100                       | 40       | 33850461     | 0.224                    | 8.9                    | 8.9     |
| ST-6A                         | 100                       | 10       | 54433169     | 0.345                    | 3.4                    | 3.4     |
| ST-9V                         | 100                       | 2        | 24713348     | 0.170                    | 0.3                    | 0.3     |
| ST-12F                        | 100                       | 20       | 47679658     | 0.305                    | 6.1                    | 6.1     |
| ST-19A                        | 100                       | 10       | 49969650     | 0.318                    | 3.2                    | 3.2     |
| Standard Curve R <sup>2</sup> |                           |          | 0.9980       |                          |                        |         |
| Intercept                     |                           |          | -4161145.051 |                          |                        |         |
| Slope                         |                           |          | 169962384.3  |                          |                        |         |

| Experiment-3                  | Sample [Total Ps] (µg/mL) | Dilution | FLR Area     | Measured [C-Ps2] (µg/mL) | Sample [C-Ps2] (µg/mL) | % C-Ps2 |
|-------------------------------|---------------------------|----------|--------------|--------------------------|------------------------|---------|
| ST-4                          | 100                       | 40       | 33352699     | 0.230                    | 9.2                    | 9.2     |
| ST-6A                         | 100                       | 10       | 53249373     | 0.351                    | 3.5                    | 3.5     |
| ST-9V                         | 100                       | 2        | 24103672     | 0.174                    | 0.3                    | 0.3     |
| ST-12F                        | 100                       | 20       | 47109572     | 0.313                    | 6.3                    | 6.3     |
| ST-19A                        | 100                       | 10       | 48981074     | 0.325                    | 3.2                    | 3.2     |
| Standard Curve R <sup>2</sup> |                           |          | 0.997309788  |                          |                        |         |
| Intercept                     |                           |          | -4522813.743 |                          |                        |         |
| Slope                         |                           |          | 164723862.7  |                          |                        |         |

| Experiment-4                  | Sample [Total Ps] (µg/mL) | Dilution | FLR Area     | Measured [C-Ps2] (µg/mL) | Sample [C-Ps2] (µg/mL) | % C-Ps2 |
|-------------------------------|---------------------------|----------|--------------|--------------------------|------------------------|---------|
| ST-4                          | 100                       | 40       | 35780760     | 0.228                    | 9.1                    | 9.1     |
| ST-6A                         | 100                       | 10       | 49987589     | 0.306                    | 3.1                    | 3.1     |
| ST-9V                         | 100                       | 2        | 25219551     | 0.171                    | 0.3                    | 0.3     |
| ST-12F                        | 100                       | 20       | 46456145     | 0.287                    | 5.7                    | 5.7     |
| ST-19A                        | 100                       | 10       | 65717763     | 0.391                    | 3.9                    | 3.9     |
| Standard Curve R <sup>2</sup> |                           |          | 0.9951       |                          |                        |         |
| Intercept                     |                           |          | -6200337.989 |                          |                        |         |
| Slope                         |                           |          | 183782469.3  |                          |                        |         |

| Experiment-5                  | Sample [Total Ps] (µg/mL) | Dilution | FLR Area    | Measured [C-Ps2] (µg/mL) | Sample [C-Ps2] (µg/mL) | % C-Ps2 |
|-------------------------------|---------------------------|----------|-------------|--------------------------|------------------------|---------|
| ST-4                          | 100                       | 40       | 36334693    | 0.210                    | 8.4                    | 8.4     |
| ST-6A                         | 100                       | 10       | 51612263    | 0.287                    | 2.9                    | 2.9     |
| ST-9V                         | 100                       | 2        | 25638340    | 0.156                    | 0.3                    | 0.3     |
| ST-12F                        | 100                       | 20       | 50790085    | 0.283                    | 5.7                    | 5.7     |
| ST-19A                        | 100                       | 10       | 72922774    | 0.394                    | 3.9                    | 3.9     |
| Standard Curve R <sup>2</sup> |                           |          | 0.996980507 |                          |                        |         |
| Intercept                     |                           |          | -5187280.18 |                          |                        |         |
| Slope                         |                           |          | 198092138.6 |                          |                        |         |

| Experiment-6 | Sample [Total Ps] (µg/mL) | Dilution | FLR Area | Measured [C-Ps2] (µg/mL) | Sample [C-Ps2] (µg/mL) | % C-Ps2 |
|--------------|---------------------------|----------|----------|--------------------------|------------------------|---------|
| ST-4         | 100                       | 40       | 36903472 | 0.222                    | 8.9                    | 8.9     |
| ST-6A        | 100                       | 10       | 51580167 | 0.299                    | 3.0                    | 3.0     |
| ST-9V        | 100                       | 2        | 25282217 | 0.162                    | 0.3                    | 0.3     |
| ST-12F       | 100                       | 20       | 48833858 | 0.284                    | 5.7                    | 5.7     |
| ST-19A       | 100                       | 10       | 71283000 | 0.401                    | 4.0                    | 4.0     |

|                               |              |  |  |  |
|-------------------------------|--------------|--|--|--|
| Standard Curve R <sup>2</sup> | 0.995572499  |  |  |  |
| Intercept                     | -6015654.775 |  |  |  |
| Slope                         | 192949534.3  |  |  |  |

Table S3. Preparation of spike sample and calculation for spike recovery

### 1. Sample Preparation

| Spike sample | 100 µg/mL ST-19A (µL) | mAb (1.0 mg/mL) (µL) | 1.53 ug/mL C-Ps2 stock spike in (µL) | Binding buffer (µL) | Total Vol (µL) | Spike dilution | Theoretical spike [C-Ps2] (ug/mL) |
|--------------|-----------------------|----------------------|--------------------------------------|---------------------|----------------|----------------|-----------------------------------|
| Spike-Ctrl   | 10                    | 15                   |                                      | 185                 | 200            |                |                                   |
| Spike-1      | 10                    | 15                   | 20                                   | 155                 | 200            | 10             | 0.153                             |
| Spike-2      | 10                    | 15                   | 40                                   | 135                 | 200            | 5              | 0.306                             |
| Spike-3      | 10                    | 15                   | 70                                   | 105                 | 200            | 2.86           | 0.536                             |

### 2. Spike recovery calculation

| Sample    | FLR peak area | (Spike-Ctrl) FLR peak area | Measured spike [C-Ps2] (µg/mL) | Theoretical spike [C-Ps2] (µg/mL) | % Rec |
|-----------|---------------|----------------------------|--------------------------------|-----------------------------------|-------|
| 19A-Ctrl  | 14442536      |                            |                                |                                   |       |
| Spike-1   | 28113195      | 13670659                   | 0.159                          | 0.153                             | 104   |
| Spike-2   | 41702632      | 27260096                   | 0.322                          | 0.307                             | 105   |
| Spike-3   | 62493826      | 48051290                   | 0.572                          | 0.536                             | 107   |
| RSQ       |               |                            | 0.999219701                    |                                   |       |
| Intercept |               |                            | 396030.8849                    |                                   |       |
| Slope     |               |                            | 83344001.21                    |                                   |       |

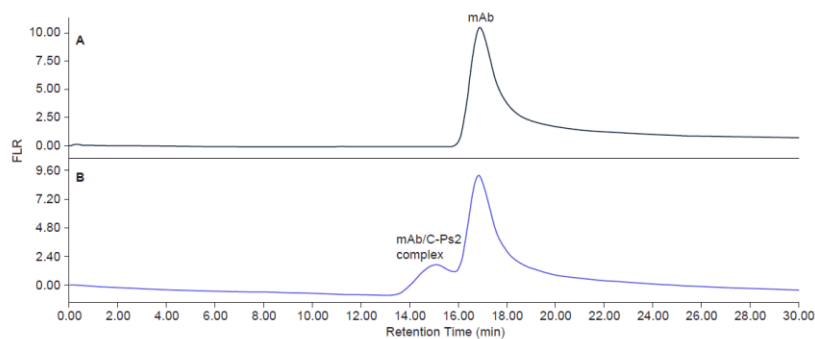

Figure S1. Comparison of mAb binding to SSI CWPS1 (C-Ps1) and mAb binding to SSI CWPS-multi (C-Ps1 + C-Ps2) on AE-HPLC. A. Binding to C-Ps1: no mAb/C-Ps1 complex detected. B. Binding to (C-Ps1 + C-Ps2): mAb/C-Ps2 complex was detected

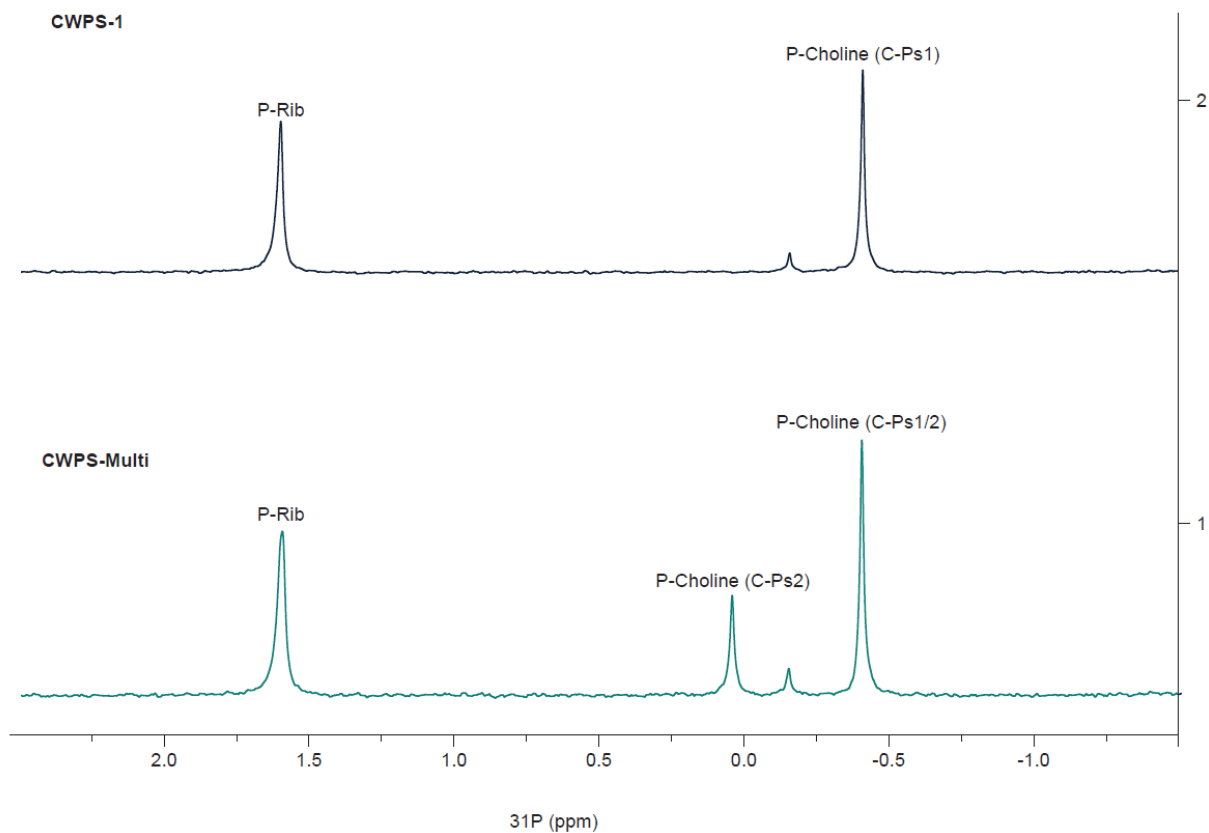

Figure S2.  $^{31}\text{P}$  NMR of C-Ps standards: CWPS1 (C-Ps1) and CWPS-multi (C-Ps1 + C-Ps2). One phosphocholine (P-choline) was detected in CWPS1 and two phosphocholines were observed in CWPS-multi.

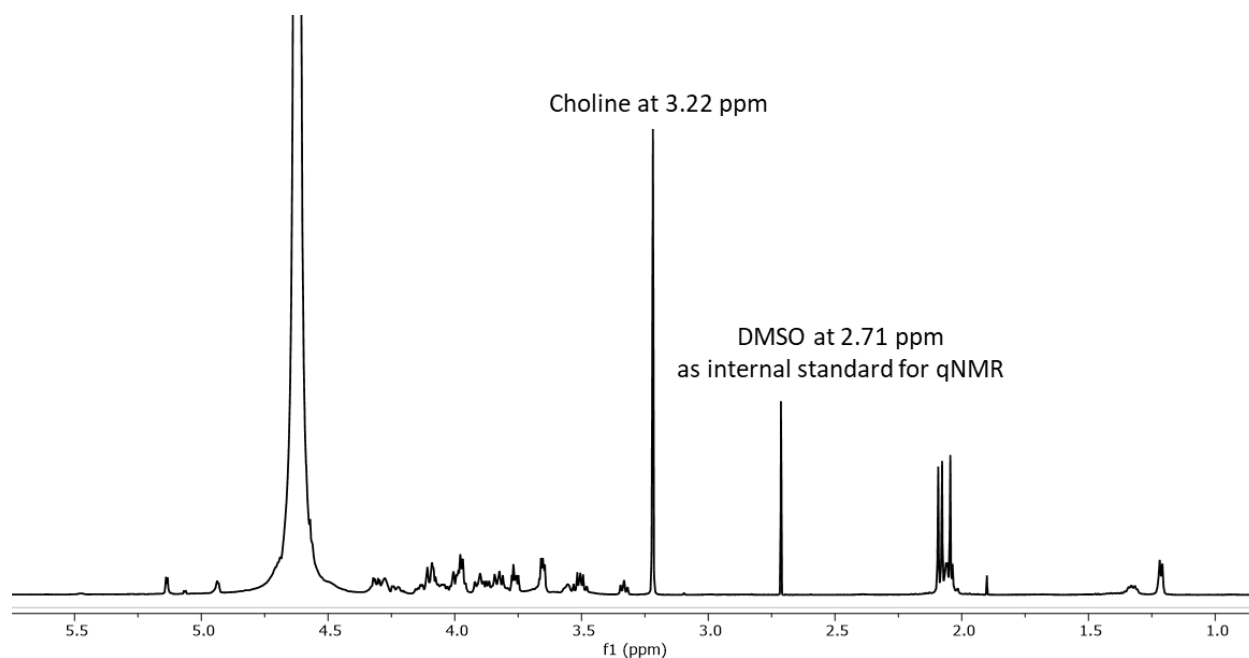

Figure S3. Quantitative NMR analysis for CWPS was performed based on the resonance integration of choline signal at 3.22 ppm and DMSO signal at 2.71 ppm. <sup>1</sup>H NMR data were acquired at 49 °C in D<sub>2</sub>O. The concentration of DMSO in the solvent is 1.411 mM. Molecular weight (Da) used in the calculations were 1134 for C-Ps1 repeating unit and 1299 for C-Ps2 repeating unit.
